# Supplementary material for: The different magnetic relaxation behaviors in [Fe(CN)6]3− or [Co(CN)6]3− bridged 3d–4f heterometallic compounds
Source: Royal Society of Chemistry journal article supplement (doi:10.1039/d0ce00039f), 2020-01-01
Supplement: d0ce00039f1.pdf [file d0ce00039f1.pdf]

The Different Magnetic Relaxation Behaviors in  $[\text{Fe}(\text{CN})_6]^{3-}$  or  $[\text{Co}(\text{CN})_6]^{3-}$  Bridged  
3d-4f Heterometallic Compounds

Ruirui Wang, Haili Wang, Juan Wang, Feifei Bai, Yue Ma,\* Licun Li, Qinglun Wang,  
Bin Zhao\* and Peng Cheng

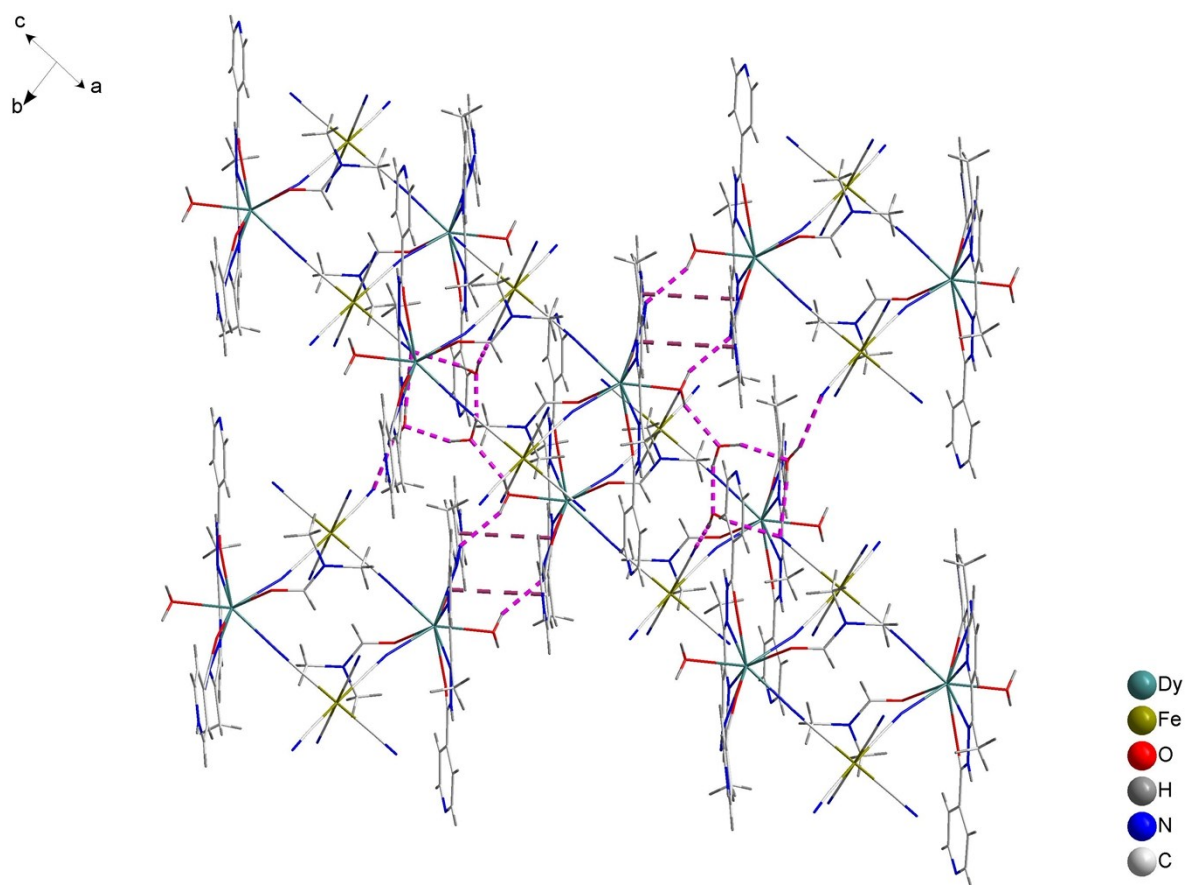

**Figure S1** Crystal packing diagram of complex  $1_{\text{DyFe}}$

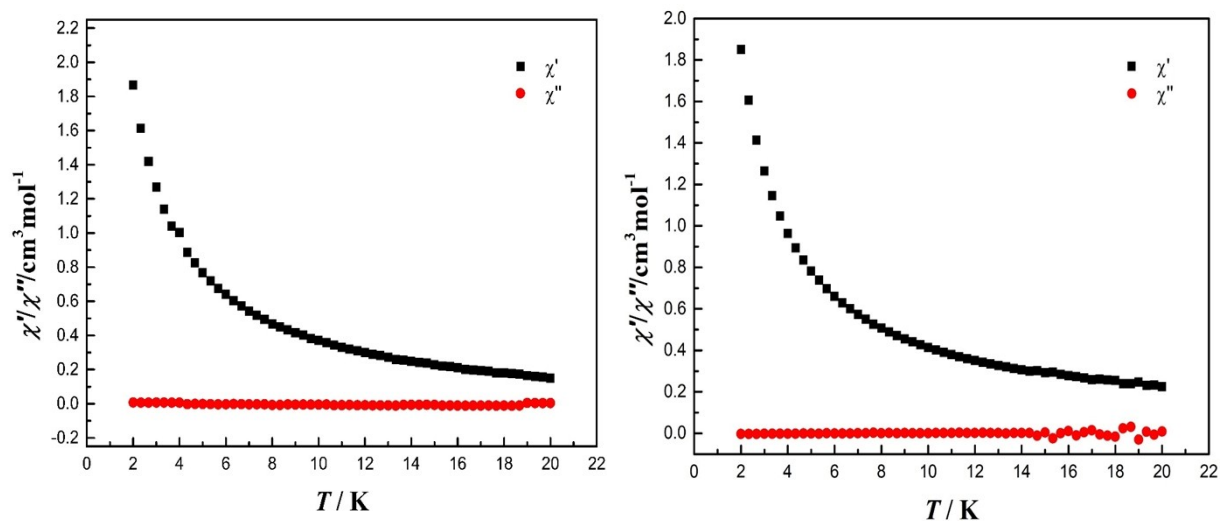

**Figure S2** (left) Temperature dependence of the  $\chi'$  and  $\chi''$  ac magnetic susceptibility for  $1_{\text{DyFe}}$  and (right)  $4_{\text{DyCo}}$  in 940 Hz under zero dc field

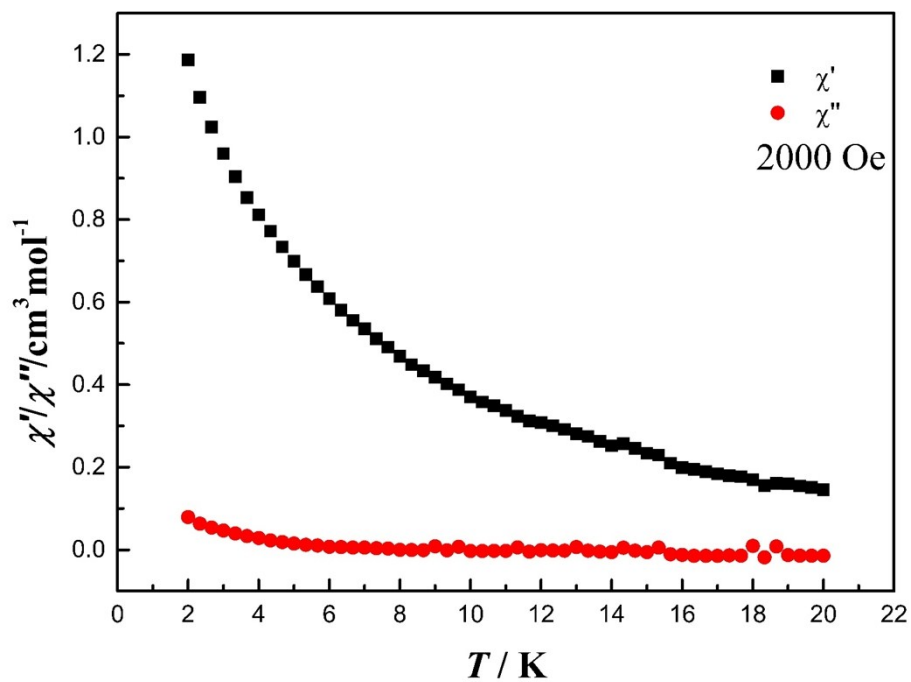

**Figure S3** Temperature dependence of the  $\chi'$  and  $\chi''$  ac magnetic susceptibility for  $1_{\text{DyFe}}$  in 940 Hz under 2000 Oe dc field

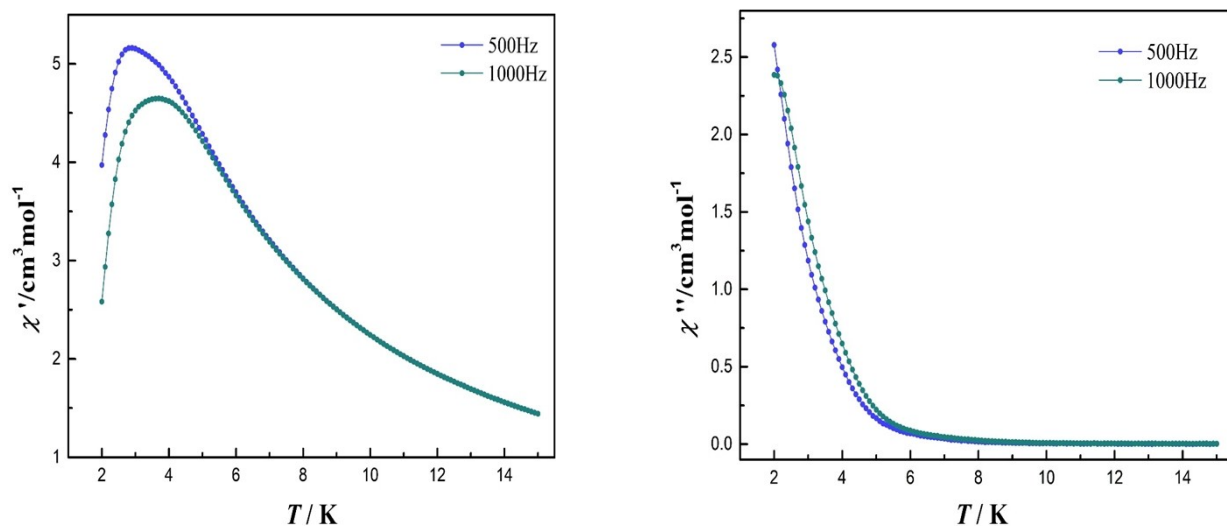

**Figure S4** Temperature dependence of the  $\chi'$  and  $\chi''$  ac magnetic susceptibility for  $4\text{DyCo}$  under 1000 Oe dc field

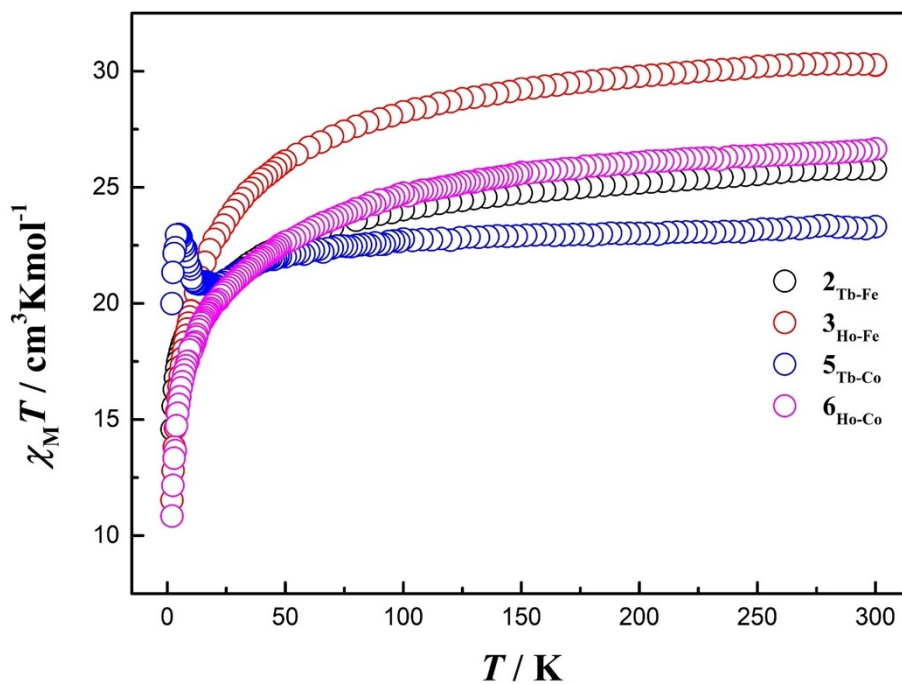

**Figure S5** Temperature dependence of  $\chi_M T$  for complexes  $2_{\text{TbFe}}$ ,  $3_{\text{HoFe}}$ ,  $5_{\text{TbCo}}$  and  $6_{\text{HoCo}}$  in the range of 2–300 K under 1000 Oe dc field

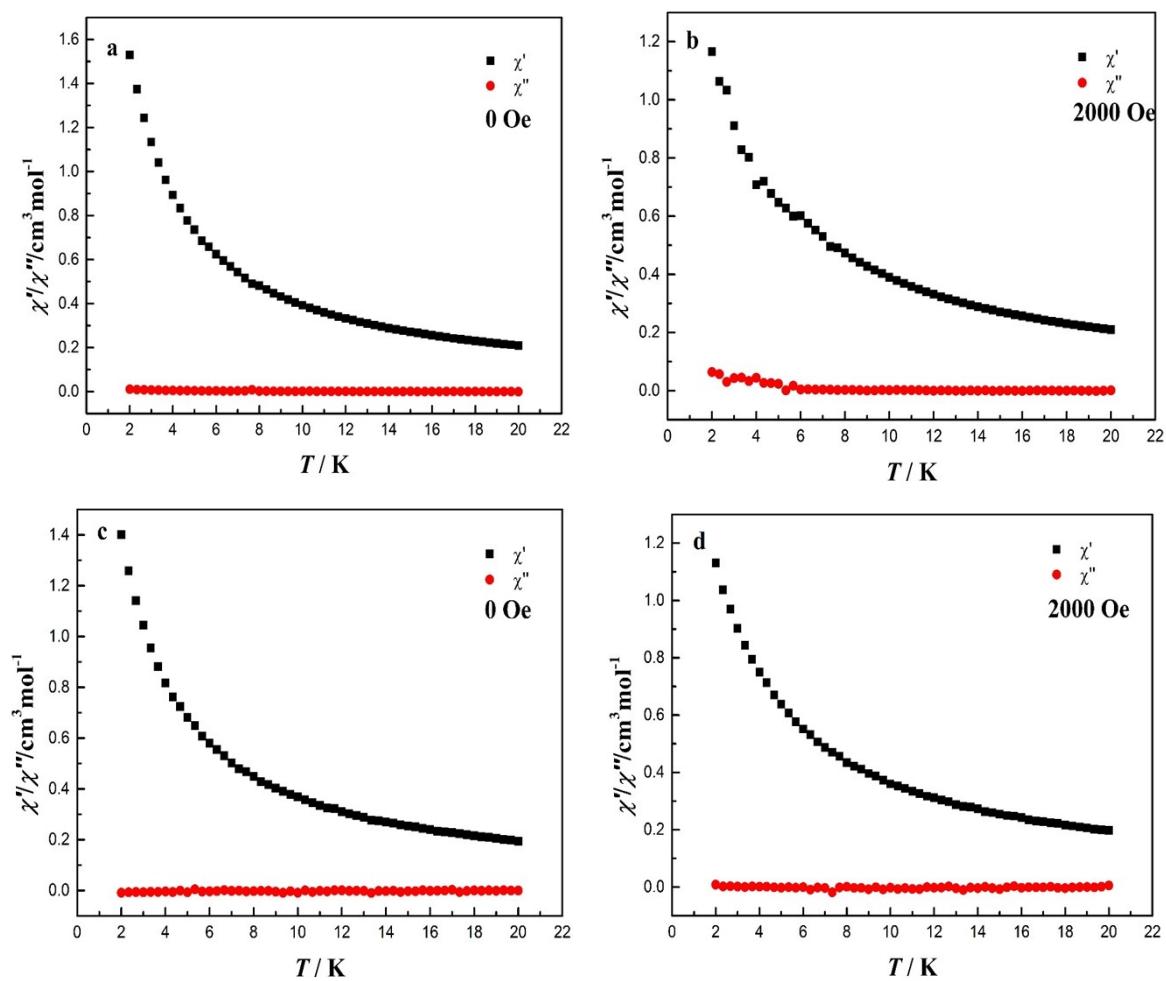

**Figure S6** (a) and (b) Temperature dependence of  $\chi'$  and  $\chi''$  ac magnetic susceptibility for  $2\text{TbFe}$  in 940 Hz under 0 and 2000 Oe dc field. (c) and (d) Temperature dependence of  $\chi'$  and  $\chi''$  ac magnetic susceptibility for  $5\text{TbCo}$  in 940 Hz under 0 and 2000 Oe dc field

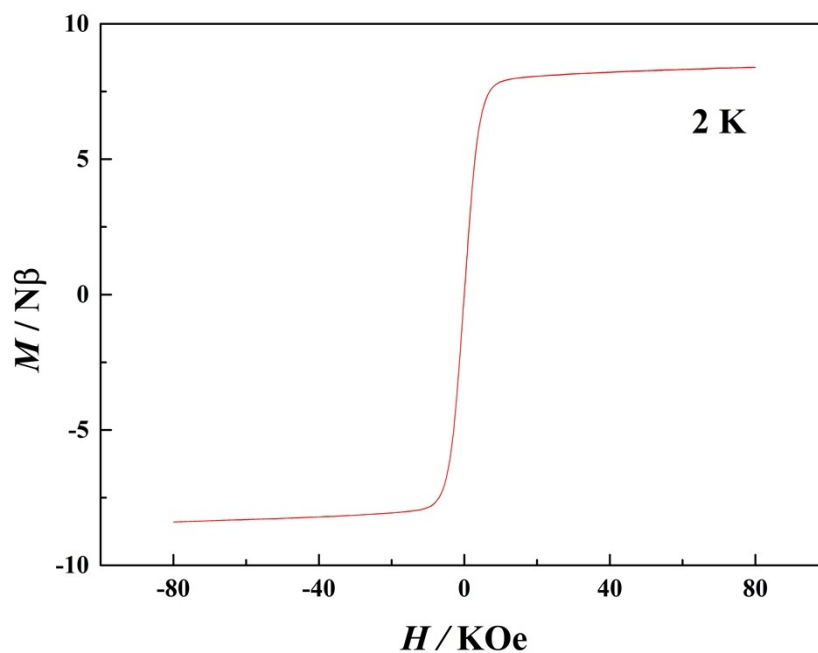

**Figure S7** Magnetization curve versus applied field measured at 2 K for complex **4<sub>DyCo</sub>**

**Table S1** Ln<sup>III</sup> ion geometry analysis by SHAPE software for all the six complexes.

| Complexes               | <i>C<sub>s</sub></i> -Muffin | <i>C<sub>4v</sub></i> -CSAPR | <i>D<sub>3h</sub></i> -TCTPR |
|-------------------------|------------------------------|------------------------------|------------------------------|
| <b>1<sub>DyFe</sub></b> | 2.434                        | 2.541                        | 2.562                        |
| <b>2<sub>TbFe</sub></b> | 2.427                        | 2.572                        | 2.631                        |
| <b>3<sub>HoFe</sub></b> | 2.340                        | 2.469                        | 2.474                        |
| <b>4<sub>DyCo</sub></b> | 2.412                        | 2.513                        | 2.534                        |
| <b>5<sub>TbCo</sub></b> | 2.478                        | 2.558                        | 2.614                        |
| <b>6<sub>HoCo</sub></b> | 2.366                        | 2.463                        | 2.466                        |

**Table S2** Selected bond lengths [Å] and-angles [°] for complex **1<sub>DyFe</sub>**

| Bond Lengths |            |              |            |
|--------------|------------|--------------|------------|
| Dy1-O3       | 2.365(3)   | Dy1-O4       | 2.331(3)   |
| Dy1-O1       | 2.451(3)   | Dy1-O2       | 2.358(3)   |
| Dy1-N3       | 2.622(4)   | Dy1-N5       | 2.564(4)   |
| Dy1-N4       | 2.570(4)   | Dy1-N8       | 2.442(4)   |
| Dy1-N9       | 2.470(4)   | Fe1-C22      | 1.923(5)   |
| Fe1-C25      | 1.930(5)   | Fe1-C27      | 1.936(6)   |
| Fe1-C26      | 1.943(6)   | Fe1-C24      | 1.953(6)   |
| Fe1-C23      | 1.939(5)   | O4-H4A...N6  | 2.781(5)   |
| O4-H4B...O1  | 2.849(5)   | O4-H4B...O6  | 2.652(6)   |
| O5-H5A...N11 | 3.008(1)   | O5-H5B...N13 | 2.968(1)   |
| O6-H6A...O7  | 2.688(7)   | O6-H6B...O5  | 2.690(1)   |
| N7-H7A...N13 | 2.788(7)   | N7-H7B...N12 | 2.785(7)   |
| Bond angles  |            |              |            |
| O1-Dy1-N4    | 120.69(11) | O4-Dy1-O3    | 126.90(12) |
| O1-Dy1-N5    | 148.42(11) | O4-Dy1-N3    | 74.11(11)  |
| O1-Dy1-N9    | 79.27(12)  | O4-Dy1-N4    | 82.83(12)  |
| O2-Dy1-O1    | 102.73(11) | O4-Dy1-N5    | 76.23(11)  |
| O2-Dy1-O3    | 72.79(11)  | O4-Dy1-N8    | 142.84(13) |
| O2-Dy1-N3    | 151.28(12) | O4-Dy1-N9    | 136.58(12) |
| O2-Dy1-N4    | 124.46(12) | N4-Dy1-N3    | 59.82(13)  |
| O2-Dy1-N5    | 63.40(12)  | N5-Dy1-N3    | 116.26(13) |
| O2-Dy1-N8    | 84.06(12)  | N5-Dy1-N4    | 61.49(13)  |
| O2-Dy1-N9    | 141.30(12) | N8-Dy1-O1    | 143.37(12) |
| O3-Dy1-O1    | 71.28(11)  | N8-Dy1-N3    | 123.29(13) |
| O3-Dy1-N3    | 118.64(12) | N8-Dy1-N4    | 80.66(13)  |
| O3-Dy1-N4    | 149.89(11) | N8-Dy1-N5    | 66.62(12)  |
| O3-Dy1-N5    | 124.40(12) | N8-Dy1-N9    | 73.88(13)  |
| O3-Dy1-N8    | 76.77(13)  | N9-Dy1-N3    | 63.36(12)  |
| O3-Dy1-N9    | 71.44(12)  | N9-Dy1-N4    | 83.35(13)  |
| O4-Dy1-O1    | 73.06(11)  | N9-Dy1-N5    | 129.98(14) |
| O4-Dy1-O2    | 78.29(11)  | C25-Fe1-C24  | 92.8(2)    |
| C22-Fe1-C23  | 89.30(19)  | C25-Fe1-C26  | 91.1(2)    |
| C22-Fe1-C24  | 90.2(2)    | C25-Fe1-C27  | 87.2(2)    |
| C22-Fe1-C25  | 92.6(2)    | C26-Fe1-C24  | 176.1(2)   |
| C22-Fe1-C26  | 88.9(2)    | C27-Fe1-C23  | 90.9(2)    |
| C22-Fe1-C27  | 179.6(2)   | C27-Fe1-C24  | 90.2(2)    |
| C23-Fe1-C24  | 91.5(2)    | C27-Fe1-C26  | 90.7(2)    |
| C23-Fe1-C26  | 84.7(2)    | C25-Fe1-C23  | 175.4(2)   |

**Table S3** Selected bond lengths [Å] and-angles [°] for complex **2<sub>TbFe</sub>**

| Bond Lengths |            |              |            |
|--------------|------------|--------------|------------|
| Tb1-O4       | 2.365(5)   | Tb1-O3       | 2.382(5)   |
| Tb1-N4       | 2.569(5)   | Tb1-N2       | 2.640(6)   |
| Tb1-O2       | 2.360(5)   | Tb1-N3       | 2.588(6)   |
| Tb1-O1       | 2.468(5)   | Tb1-N9       | 2.502(6)   |
| Tb1-N10      | 2.471(6)   | Fe1-C25      | 1.929(7)   |
| Fe1-C26      | 1.923(7)   | Fe1-C27      | 1.941(8)   |
| Fe1-C28      | 1.937(9)   | Fe1-C29      | 1.946(8)   |
| Fe1-C30      | 1.933(7)   | O4-H4A...O7  | 2.669(1)   |
| O4-H4B...N5  | 2.809(8)   | O5-H5B...N12 | 3.090(2)   |
| O5-H5A...N14 | 3.060(2)   | O6-H6B...N12 | 2.792(1)   |
| O6-H6A...N13 | 2.793(1)   | O7-H7A...O5  | 2.680(2)   |
| O7-H7B...O6  | 2.689(1)   | N6-H6...N14  | 3.060(2)   |
| Bond angles  |            |              |            |
| O1-Tb1-N2    | 61.13(16)  | O4-Tb1-N10   | 142.59(18) |
| O1-Tb1-N3    | 119.95(17) | N3-Tb1-N2    | 59.75(17)  |
| O1-Tb1-N4    | 147.36(17) | N4-Tb1-N2    | 115.91(17) |
| O1-Tb1-N9    | 79.38(19)  | N4-Tb1-N3    | 61.33(17)  |
| O1-Tb1-N10   | 143.92(18) | N9-Tb1-N2    | 63.61(18)  |
| O2-Tb1-O1    | 103.30(16) | N9-Tb1-N3    | 83.95(19)  |
| O2-Tb1-O3    | 73.21(17)  | N9-Tb1-N4    | 130.6(2)   |
| O2-Tb1-O4    | 77.61(18)  | N10-Tb1-N2   | 123.90(19) |
| O2-Tb1-N2    | 150.96(18) | N10-Tb1-N3   | 81.44(19)  |
| O2-Tb1-N3    | 123.70(17) | N10-Tb1-N4   | 67.21(18)  |
| O2-Tb1-N4    | 62.80(17)  | N10-Tb1-N9   | 74.2(2)    |
| O2-Tb1-N9    | 141.61(18) | C25-Fe1-C27  | 92.7(3)    |
| O2-Tb1-N10   | 83.60(19)  | C25-Fe1-C28  | 90.8(3)    |
| O3-Tb1-O1    | 72.01(17)  | C25-Fe1-C29  | 84.8(3)    |
| O3-Tb1-N2    | 118.85(17) | C25-Fe1-C30  | 175.1(3)   |
| O3-Tb1-N3    | 150.46(18) | C26-Fe1-C25  | 89.5(3)    |
| O3-Tb1-N4    | 124.66(18) | C26-Fe1-C27  | 90.0(3)    |
| O3-Tb1-N9    | 71.39(18)  | C26-Fe1-C28  | 179.60(3)  |
| O3-Tb1-N10   | 76.48(19)  | C26-Fe1-C29  | 89.70(3)   |
| O4-Tb1-O1    | 72.63(16)  | C26-Fe1-C30  | 92.20(3)   |
| O4-Tb1-O3    | 126.63(18) | C27-Fe1-C29  | 177.40(3)  |
| O4-Tb1-N2    | 74.33(18)  | C28-Fe1-C27  | 89.80(3)   |
| O4-Tb1-N3    | 82.58(18)  | C28-Fe1-C29  | 90.50(3)   |
| O4-Tb1-N4    | 75.43(17)  | C30-Fe1-C27  | 91.90(3)   |
| O4-Tb1-N9    | 136.98(18) | C30-Fe1-C28  | 87.40(3)   |
| C30-Fe1-C29  | 90.70(3)   |              |            |

**Table S4** Selected bond lengths [Å] and-angles [°] for complex **3<sub>HoFe</sub>**

| Bond Lengths |            |              |            |
|--------------|------------|--------------|------------|
| Ho1-O1       | 2.440(5)   | Ho1-O2       | 2.347(5)   |
| Ho1-O3       | 2.361(5)   | Ho1-O4       | 2.337(5)   |
| Ho1-N2       | 2.624(5)   | Ho1-N3       | 2.564(5)   |
| Ho1-N4       | 2.546(5)   | Ho1-N9       | 2.477(6)   |
| Ho1-N10      | 2.431(6)   | Fe2-C25      | 1.929(7)   |
| Fe2-C26      | 1.926(7)   | Fe2-C27      | 1.940(8)   |
| Fe2-C28      | 1.930(8)   | Fe2-C29      | 1.937(8)   |
| Fe2-C30      | 1.936(8)   | O4-H4A...O7  | 2.676(1)   |
| O4-H4B...N5  | 2.809(8)   | O5-H5A...N14 | 3.020(2)   |
| O5-H5B...N12 | 3.090(2)   | N6-H6...N14  | 2.731(1)   |
| O6-H6A...N13 | 2.799(1)   | O6-H5B...N12 | 2.810(1)   |
| O7-H7A...O5  | 2.670(2)   | O7-H7B...O6  | 2.685(1)   |
| Bond angles  |            |              |            |
| O1-Ho1-N2    | 61.46(16)  | N4-Ho1-N2    | 116.37(17) |
| O1-Ho1-N3    | 120.82(16) | N4-Ho1-N3    | 61.62(17)  |
| O1-Ho1-N4    | 147.23(17) | N9-Ho1-N2    | 63.69(18)  |
| O1-Ho1-N9    | 79.77(18)  | N9-Ho1-N3    | 83.57(18)  |
| O2-Ho1-O1    | 101.79(16) | N9-Ho1-N4    | 130.67(19) |
| O2-Ho1-O3    | 72.80(16)  | N10-Ho1-O1   | 143.35(17) |
| O2-Ho1-N2    | 150.25(17) | N10-Ho1-N2   | 124.44(19) |
| O2-Ho1-N3    | 124.56(16) | N10-Ho1-N3   | 81.51(19)  |
| O2-Ho1-N4    | 63.37(16)  | N10-Ho1-N4   | 67.48(18)  |
| O2-Ho1-N9    | 141.56(18) | N10-Ho1-N9   | 74.08(19)  |
| O2-Ho1-N10   | 84.11(19)  | C25-Fe1-C27  | 92.3(3)    |
| O3-Ho1-O1    | 71.20(17)  | C25-Fe1-C28  | 90.6(3)    |
| O3-Ho1-N2    | 118.46(17) | C25-Fe1-C29  | 84.8(3)    |
| O3-Ho1-N3    | 150.28(17) | C25-Fe1-C30  | 174.7(3)   |
| O3-Ho1-N4    | 124.69(17) | C26-Fe1-C25  | 89.7(3)    |
| O3-Ho1-N9    | 71.51(18)  | C26-Fe1-C27  | 90.0(3)    |
| O3-Ho1-N10   | 76.36(18)  | C26-Fe1-C28  | 179.6(3)   |
| O4-Ho1-O1    | 72.65(16)  | C26-Fe1-C29  | 89.7(3)    |
| O4-Ho1-O2    | 77.48(17)  | C26-Fe1-C30  | 92.3(3)    |
| O4-Ho1-O3    | 126.41(18) | C28-Fe1-C27  | 89.7(3)    |
| O4-Ho1-N2    | 74.06(17)  | C28-Fe1-C29  | 90.6(3)    |
| O4-Ho1-N3    | 82.94(17)  | C28-Fe1-C30  | 87.4(3)    |
| O4-Ho1-N4    | 75.52(17)  | C29-Fe1-C27  | 177.1(3)   |
| O4-Ho1-N9    | 136.87(18) | C30-Fe1-C27  | 92.6(3)    |
| O4-Ho1-N10   | 142.94(18) | C30-Fe1-C29  | 90.3(3)    |
| N3-Ho1-N2    | 60.22(17)  |              |            |



**Table S5** Selected bond lengths [Å] and-angles [°] for complex **4<sub>DyCo</sub>**

| Bond Lengths |            |              |            |
|--------------|------------|--------------|------------|
| Dy1-O4       | 2.356(3)   | Dy1-N8       | 2.451(3)   |
| Dy1-O3       | 2.368(3)   | Dy1-O1       | 2.356(3)   |
| Dy1-O2       | 2.449(3)   | Dy1-N5       | 2.630(3)   |
| Dy1-N4       | 2.576(3)   | Dy1-N3       | 2.563(3)   |
| Dy1-N9       | 2.490(3)   | Co1-C22      | 1.888(4)   |
| Co1-C25      | 1.898(4)   | Co1-C26      | 1.905(5)   |
| Co1-C27      | 1.887(4)   | Co1-C23      | 1.890(4)   |
| Co1-C24      | 1.900(5)   | O4-H4A...N2  | 2.810(4)   |
| O4-H4B...O6  | 2.676(6)   | O5-H5A...N13 | 2.819(7)   |
| O5-H5B...N10 | 2.795(7)   | O6-H6A...O5  | 2.700(7)   |
| O6-H6B...O7  | 2.691(1)   | O7-H7A...N11 | 3.046(1)   |
| N1-H1...N11  | 2.740(7)   | O7-H7B...N13 | 3.089(1)   |
| Bond angles  |            |              |            |
| O3-Dy1-N4    | 150.45(10) | N8-Dy1-N5    | 124.03(11) |
| O3-Dy1-N3    | 124.46(10) | N8-Dy1-N9    | 74.39(11)  |
| O3-Dy1-N8    | 76.41(11)  | N9-Dy1-N4    | 84.06(11)  |
| O3-Dy1-N5    | 118.87(10) | N9-Dy1-N3    | 131.05(11) |
| O3-Dy1-N9    | 71.41(11)  | N9-Dy1-N5    | 63.55(11)  |
| O3-Dy1-O2    | 71.74(10)  | O2-Dy1-N4    | 120.41(10) |
| O4-Dy1-O3    | 126.63(11) | O2-Dy1-N3    | 147.25(10) |
| O4-Dy1-N4    | 82.56(11)  | O2-Dy1-N8    | 143.69(10) |
| O4-Dy1-O1    | 77.79(11)  | O2-Dy1-N5    | 61.37(9)   |
| O4-Dy1-N3    | 75.82(10)  | O2-Dy1-N9    | 79.26(11)  |
| O4-Dy1-N8    | 143.13(10) | C25-Co1-C26  | 91.4(2)    |
| O4-Dy1-N5    | 73.72(10)  | C25-Co1-C24  | 90.6(2)    |
| O4-Dy1-N9    | 136.26(11) | C22-Co1-C25  | 91.34(18)  |
| O4-Dy1-O2    | 72.31(10)  | C22-Co1-C23  | 90.04(16)  |
| N4-Dy1-N5    | 59.94(10)  | C22-Co1-C26  | 90.04(18)  |
| O1-Dy1-O3    | 72.86(10)  | C22-Co1-C24  | 89.78(17)  |
| O1-Dy1-N4    | 124.23(10) | C27-Co1-C25  | 88.1(2)    |
| O1-Dy1-N3    | 63.21(10)  | C27-Co1-C22  | 179.29(19) |
| O1-Dy1-N8    | 84.26(11)  | C27-Co1-C23  | 90.58(18)  |
| O1-Dy1-N5    | 150.35(10) | C27-Co1-C26  | 89.6(2)    |
| O1-Dy1-N9    | 141.68(11) | C27-Co1-C24  | 90.60(19)  |
| O1-Dy1-O2    | 102.21(9)  | C23-Co1-C25  | 176.12(19) |
| N3-Dy1-N4    | 61.50(10)  | C23-Co1-C26  | 92.26(18)  |
| N3-Dy1-N5    | 116.15(10) | C23-Co1-C24  | 85.80(18)  |
| N8-Dy1-N4    | 81.41(11)  | C24-Co1-C26  | 178.05(18) |
| N8-Dy1-N3    | 67.34(10)  |              |            |

**Table S6** Selected bond lengths [Å] and-angles [°] for complex **5<sub>TbCo</sub>**

| Bond Lengths |            |              |            |
|--------------|------------|--------------|------------|
| Tb1-O3       | 2.368(5)   | Tb1-O4       | 2.347(5)   |
| Tb1-N4       | 2.581(6)   | Tb1-O1       | 2.366(5)   |
| Tb1-N3       | 2.570(5)   | Tb1-N8       | 2.467(6)   |
| Tb1-N5       | 2.637(6)   | Tb1-N9       | 2.480(6)   |
| Tb1-O2       | 2.459(5)   | Co1-C25      | 1.891(8)   |
| Co1-C22      | 1.894(7)   | Co1-C27      | 1.888(7)   |
| Co1-C23      | 1.886(7)   | Co1-C26      | 1.906(7)   |
| Co1-C24      | 1.898(7)   | O4-H4A...N2  | 2.774(8)   |
| O4-H4B...O6  | 2.657(1)   | O5-H5A...N13 | 2.807(1)   |
| O5-H5B...N10 | 2.772(1)   | O6-H6A...O5  | 2.686(1)   |
| O6-H6B...O7  | 2.800(2)   | O7-H7A...N11 | 3.101(2)   |
| N1-H1A...N11 | 2.742(1)   | O7-H7B...N13 | 2.936(2)   |
| Bond angles  |            |              |            |
| O3-Tb1-N4    | 149.76(17) | N8-Tb1-N5    | 123.46(19) |
| O3-Tb1-N3    | 123.95(17) | N8-Tb1-N9    | 73.97(19)  |
| O3-Tb1-N8    | 76.12(18)  | N9-Tb1-N4    | 83.99(19)  |
| O3-Tb1-N5    | 119.18(17) | N9-Tb1-N3    | 130.29(19) |
| O3-Tb1-N9    | 71.11(18)  | N9-Tb1-N5    | 63.69(18)  |
| O3-Tb1-O2    | 72.31(16)  | O2-Tb1-N4    | 120.49(17) |
| O4-Tb1-O3    | 126.92(17) | O2-Tb1-N3    | 148.00(16) |
| O4-Tb1-N4    | 83.05(18)  | O2-Tb1-N8    | 143.77(17) |
| O4-Tb1-O1    | 78.26(17)  | O2-Tb1-N5    | 61.44(16)  |
| O4-Tb1-N3    | 76.34(17)  | O2-Tb1-N9    | 79.32(18)  |
| O4-Tb1-N8    | 142.99(17) | C25-Co1-C22  | 91.3(3)    |
| O4-Tb1-N5    | 74.19(17)  | C25-Co1-C26  | 91.3(3)    |
| O4-Tb1-N9    | 136.83(17) | C25-Co1-C24  | 91.2(3)    |
| O4-Tb1-O2    | 72.44(16)  | C22-Co1-C26  | 90.4(3)    |
| N4-Tb1-N5    | 59.92(17)  | C22-Co1-C24  | 89.1(3)    |
| O1-Tb1-O3    | 72.70(16)  | C27-Co1-C25  | 88.1(3)    |
| O1-Tb1-N4    | 123.96(17) | C27-Co1-C22  | 179.3(3)   |
| O1-Tb1-N3    | 63.10(16)  | C27-Co1-C26  | 90.0(3)    |
| O1-Tb1-N8    | 83.61(19)  | C27-Co1-C24  | 90.5(3)    |
| O1-Tb1-N5    | 151.46(17) | C23-Co1-C25  | 176.9(3)   |
| O1-Tb1-N9    | 140.94(18) | C23-Co1-C22  | 90.0(3)    |
| O1-Tb1-O2    | 103.16(16) | C23-Co1-C27  | 90.5(3)    |
| N3-Tb1-N4    | 61.25(17)  | C23-Co1-C26  | 91.5(3)    |
| N3-Tb1-N5    | 116.13(17) | C23-Co1-C24  | 86.0(3)    |
| N8-Tb1-N4    | 80.80(19)  | C24-Co1-C26  | 177.4(3)   |
| N8-Tb1-N3    | 66.69(18)  |              |            |

**Table S7** Selected bond lengths [ $\text{\AA}$ ] and-angles [ $^\circ$ ] for complex **6<sub>HoCo</sub>**

| Bond Lengths |            |              |            |
|--------------|------------|--------------|------------|
| Ho1-O3       | 2.348(4)   | Ho1-O2       | 2.439(4)   |
| Ho1-O4       | 2.344(5)   | Ho1-N4       | 2.555(6)   |
| Ho1-N5       | 2.622(5)   | Ho1-O1       | 2.350(4)   |
| Ho1-N3       | 2.542(5)   | Ho1-N9       | 2.479(6)   |
| Ho1-N8       | 2.439(6)   | Co1-C23      | 1.887(7)   |
| Co1-C22      | 1.887(7)   | Co1-C25      | 1.885(8)   |
| Co1-C24      | 1.905(8)   | Co1-C27      | 1.893(8)   |
| Co1-C26      | 1.910(8)   | O4-H4A...N2  | 2.806(8)   |
| O4-H4B...O6  | 2.671(1)   | O5-H5A...N13 | 2.816(1)   |
| O5-H5B...N10 | 2.792(1)   | O6-H6A...O5  | 2.699(1)   |
| O6-H6B...O7  | 2.700(2)   | O7-H7A...N11 | 3.026(2)   |
| N1-H1A...N11 | 2.751(1)   | O7-H7B...N13 | 3.060(2)   |
| Bond angles  |            |              |            |
| O3-Ho1-N4    | 150.27(18) | N8-Ho1-N5    | 124.10(19) |
| O3-Ho1-O1    | 72.72(17)  | N8-Ho1-N9    | 74.2(2)    |
| O3-Ho1-N3    | 124.27(17) | N9-Ho1-N4    | 83.84(19)  |
| O3-Ho1-N8    | 76.40(19)  | N9-Ho1-N3    | 131.11(19) |
| O3-Ho1-N5    | 118.85(17) | N9-Ho1-N5    | 63.71(18)  |
| O3-Ho1-N9    | 71.45(19)  | O2-Ho1-N4    | 120.90(16) |
| O3-Ho1-O2    | 71.35(16)  | O2-Ho1-N3    | 147.22(17) |
| O4-Ho1-O3    | 126.61(18) | O2-Ho1-N8    | 143.39(17) |
| O4-Ho1-N4    | 82.77(18)  | O2-Ho1-N5    | 61.68(16)  |
| O4-Ho1-O1    | 77.70(18)  | O2-Ho1-N9    | 79.47(18)  |
| O4-Ho1-N3    | 75.69(17)  | C25-Co1-C22  | 91.4(3)    |
| O4-Ho1-N8    | 143.10(17) | C25-Co1-C27  | 87.7(3)    |
| O4-Ho1-N5    | 73.73(17)  | C25-Co1-C23  | 176.4(3)   |
| O4-Ho1-N9    | 136.47(18) | C25-Co1-C26  | 91.6(3)    |
| O4-Ho1-O2    | 72.57(16)  | C25-Co1-C24  | 90.7(3)    |
| N4-Ho1-N5    | 60.07(17)  | C22-Co1-C27  | 179.0(3)   |
| O1-Ho1-N4    | 124.47(17) | C22-Co1-C26  | 90.3(3)    |
| O1-Ho1-N3    | 63.11(17)  | C22-Co1-C24  | 89.7(3)    |
| O1-Ho1-N8    | 84.41(19)  | C27-Co1-C26  | 89.2(3)    |
| O1-Ho1-N5    | 150.20(17) | C27-Co1-C24  | 90.9(3)    |
| O1-Ho1-N9    | 141.58(18) | C23-Co1-C22  | 90.0(3)    |
| O1-Ho1-O2    | 101.75(16) | C23-Co1-C27  | 90.9(3)    |
| N3-Ho1-N4    | 61.81(17)  | C23-Co1-C26  | 91.7(3)    |
| N3-Ho1-N5    | 116.39(17) | C23-Co1-C24  | 86.0(3)    |
| N8-Ho1-N4    | 81.24(19)  | C24-Co1-C26  | 177.6(3)   |
| N8-Ho1-N3    | 67.44(18)  |              |            |

**Table S8.** Relaxation fitting parameters from the Cole-Cole plots of  $4_{\text{DyCo}}$  under 2.0 K-4.0 K according to the generalized Debye model

| T / K | $\chi_0 / \text{cm}^3 \text{K mol}^{-1}$ | $\chi_s / \text{cm}^3 \text{K mol}^{-1}$ | $\alpha$ |
|-------|------------------------------------------|------------------------------------------|----------|
| 2.0 K | 0.01984                                  | 7.91332                                  | 0.25573  |
| 2.2 K | 0.03342                                  | 7.64786                                  | 0.31364  |
| 2.4 K | 0.05097                                  | 7.28297                                  | 0.31607  |
| 2.7 K | 0.17211                                  | 6.90405                                  | 0.36394  |
| 3.0 K | 0.21314                                  | 6.53746                                  | 0.40939  |
| 3.2 K | 0.42117                                  | 6.28899                                  | 0.42524  |
| 3.5 K | 0.98630                                  | 5.86159                                  | 0.40912  |
| 4.0 K | 1.49607                                  | 5.33725                                  | 0.42354  |
